# Supplementary material for: Lipids influence the proton pump activity of photosynthetic protein embedded in nanodiscs
Source: Royal Society of Chemistry journal article supplement (doi:10.1039/c6ra13650h), 2016-01-01
Supplement: c6ra13650h1.pdf [file c6ra13650h1.pdf]

## Supporting Information

### Lipids Influence the Proton Pump Activity of Photosynthetic Protein Embedded in Nanodiscs

Vivien Yeh,<sup>‡b,c</sup> Yin Hsin,<sup>‡a</sup> Tsung-Yen Lee,<sup>a</sup> Jerry Chun Chung Chan,<sup>c</sup> Tsyr-Yan Yu,<sup>\*b</sup> and Li-Kang  
Chu<sup>\*a</sup>

<sup>a</sup>Department of Chemistry, National Tsing Hua University, 101, Sec. 2, Kuang-Fu Rd., Hsinchu 30013, Taiwan.

<sup>b</sup>Institute of Atomic and Molecular Sciences, Academia Sinica, 1, Sec. 4, Roosevelt Rd., Taipei 10617, Taiwan.

<sup>c</sup>Department of Chemistry, National Taiwan University, 1, Sec. 4, Roosevelt Rd., Taipei 10617, Taiwan.

\* To whom correspondences should be addressed.

Tsyr-Yan Yu; P.O. Box 23-166 Taipei, 10617, Taiwan; Phone: +886-2-23668210; E-mail:

dharmamr@gate.sinica.edu.tw

Li-Kang Chu; 101, Sec. 2, Kuang-Fu Rd., Hsinchu 30013, Taiwan; Phone: +886-3-5715131 ext. 33396;

E-mail: lkchu@mx.nthu.edu.tw

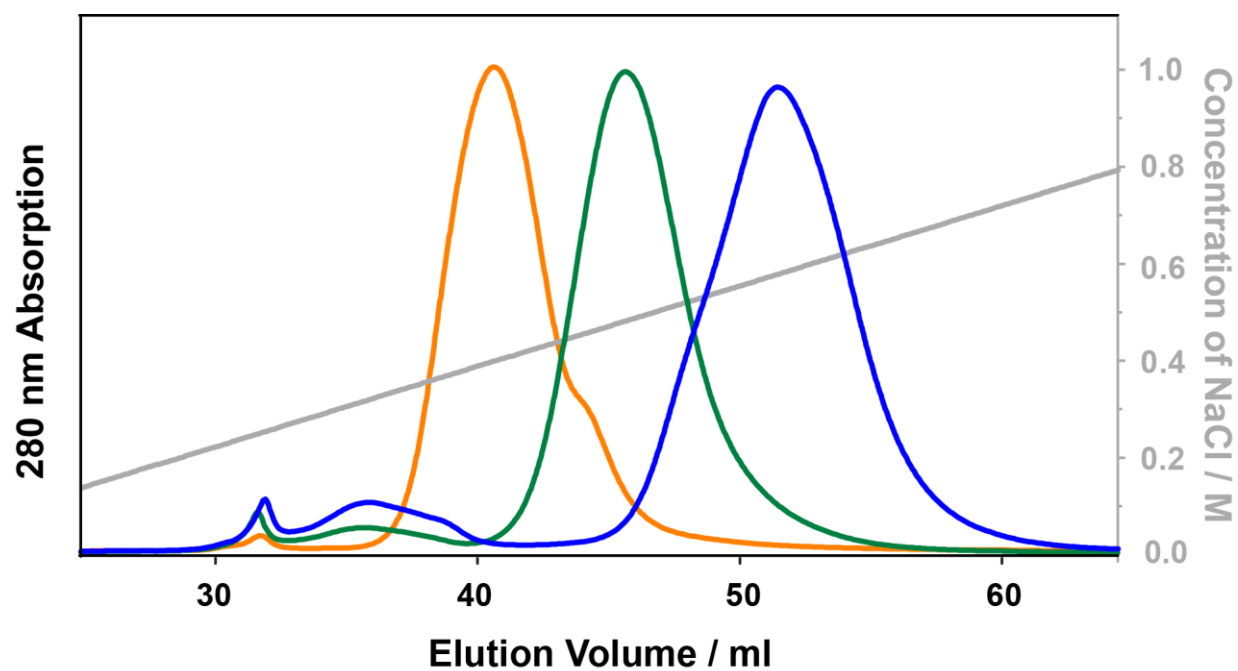

**Figure S1.** Anion-exchange chromatography profiles of bR embedded in nanodisc composed of POPG/POPC = 100/0 (blue), POPG/POPC = 50/50 (green), and POPG/POPC = 10/90 (orange), using a gradient of linearly increasing NaCl concentration, from 0 M to 1 M, in elution buffer with 25 mM Tris, 0.5 mM EDTA at pH 8.

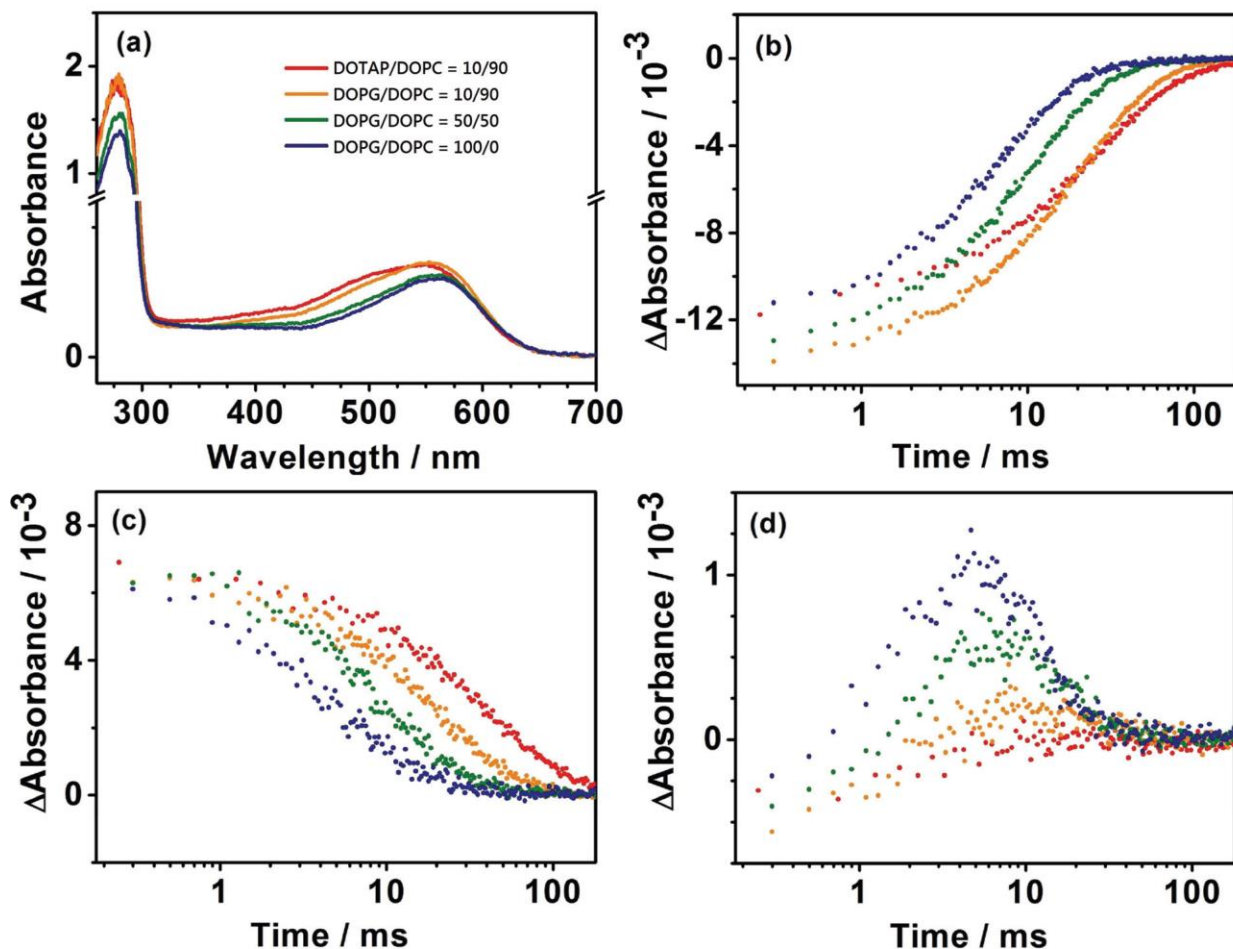

**Figure S2.** (a) Steady-state absorption spectra of bR embedded in nanodiscs composed of DOPG/DOPC = 100/0 (blue), DOPG/DOPC = 50/50 (green), DOPG/DOPC = 10/90 (orange) and DOTAP/DOPC = 10/90 (red) in the presence of 50 mM NaCl. The pH was controlled at 7.02 by adding NaOH or HCl without using buffer solution. The un-weighted temporal profiles of (b) the recovery of the parent state at 560 nm, (c) the intermediate M at 410 nm, and (d) the intermediate O at 650 nm upon 532-nm excitation ( $0.5 \text{ mJ cm}^{-2} \text{ pulse}^{-1}$ ) of these samples.
